# Supplementary material for: Incidence of Venous Thromboembolism in a Racially Diverse Population of Oklahoma County, Oklahoma
Source: PubMed Central journal article supplement — Thromb Haemost. 2021 Jan 10;121(6):816–25. doi: 10.1055/s-0040-1722189 (PMC8180377; doi:10.1055/s-0040-1722189), 2021-01-10
Supplement: 10-1055-s-0040-1722189-s200733.pdf [file 10-1055-s-0040-1722189-s200733.pdf]

# Supplementary Appendix A

1. Case definitions
  - 1.1 Deep vein thrombosis (DVT)
  - 1.2 Pulmonary embolism (PE)
2. Administrative codes used in case definition
  - 2.1 DVT-related codes
    - (a) ICD-9 CM codes
    - (b) ICD-9 Procedure codes
    - (c) CPT codes
  - 2.2 PE-related codes
    - (a) ICD-9 CM codes
    - (b) ICD-9 Procedure codes
    - (c) CPT codes
    - (d) ICD-10 codes
  1. Provoking categorization
  2. Thrombophilic and prothrombotic conditions

## 1. Case definitions

### 1.1 Case Definition of Deep Vein Thrombosis (DVT)

1. Definite
  - (a) Imaging is confirmatory
    - OR–
  - (b) Autopsy
    - OR–
  - (c) Venous thrombectomy confirms thrombus present
2. Probable
  - (a) Imaging is indeterminate—AND—review of records shows mention of DVT or suspected DVT—AND—treatment given:
    - 1) Anticoagulant
      - OR–
    - 2) DVT-related procedure: vena cava filter OR thrombolysis (systemic or catheter directed)
3. Possible: at least 2 of the following,
  - (a) ICD-9 CM code
    - OR–
  - (b) DVT-related CPT code
    - OR–
  - (c) ICD-10 CM code
    - OR–
  - (d) POA indicator listed as “Y” for DVT

**Definition of “imaging confirmatory”:** for any of the diagnostic tests of ultrasound, computed tomography venography (CTV), traditional contrast venography, or magnetic resonance imaging (MRI), if any of the text reports states (or similar language): (1) thrombus or thrombosis is present OR, (2) there are noncompressible venous segment(s), OR (3) a filling defect or intraluminal filling defect is present.

**Definition of anticoagulant treatment:** treatment for more than 72 hours with therapeutic regimens of one or a combination of the following medications: heparin, enoxaparin (Lovenox), dalteparin (Fragmin), fondaparinux (Arixtra), tinzaparin (Innohep), warfarin (Coumadin), dabigatran (Pradaxa), rivaroxaban (Xarelto), apixaban (Eliquis), edoxaban (Lixiana), argatroban, lepirudin (Refludan), bivalirudin (Angiomax).

**Medications qualifying as thrombolysis/thrombolytic treatment:** alteplase (Activase, Cathflo Activase, tissue plasminogen activator, TPA), reteplase (Retevase), tenecteplase (TNKase), urokinase (Abbokinase), streptokinase (Streptase).

## 1.2 Case Definition of Pulmonary Embolism

1. Definite:
  - (a) Imaging is confirmatory  
–OR–
  - (b) Autopsy  
–OR–
  - (c) Pulmonary embolectomy confirms embolism present
2. Probable:
  - (a) Imaging is indeterminate or not available/not done—AND—review of records shows mention of PE or suspected PE—AND—treatment given:
    - 1) Anticoagulant  
–OR–
    - 2) PE-related procedure: vena cava filter OR thrombolysis (systemic or catheter directed)  
–OR–
  - (b) Death certificate—contributing cause of death
3. Possible: at least 2 of the following,
  - (a) ICD-9 CM code  
–OR–
  - (b) PE-related CPT code  
–OR–
  - (c) ICD-10 CM code  
–OR–
  - (d) POA code indicator listed as “Y” for PE

**Definition of “imaging confirmatory”:** for any of the diagnostic tests of computed tomography angiography (CTA), ventilation perfusion (VQ) scan, pulmonary angiogram, or magnetic resonance imaging (MRI), if any of the text reports states (or similar language): (1) pulmonary embolism, embolism, clot, thrombus, OR (2) a filling defect or intraluminal filling defect is present, OR (3) high probability VQ scan, large perfusion defect with ventilation mismatch, or segmental perfusion defect with ventilation mismatch.

**Definition of anticoagulant treatment:** Same as above for DVT.

**Medications qualifying as thrombolysis/thrombolytic treatment:** Same as above for DVT.

## 2.1 DVT-related ICD-9 codes, CPT codes, and ICD-10 codes

### a. ICD-9 CM codes for DVT

| ICD-9 CM codes | Definition                                                                 |
|----------------|----------------------------------------------------------------------------|
| 451.0          | Phlebitis and thrombophlebitis of superficial vessels of lower extremities |
| 451.11         | Phlebitis and thrombophlebitis of femoral vein (deep) (superficial)        |
| 451.19         | Phlebitis and thrombophlebitis of deep veins of lower extremities, other   |
| 451.20         | Phlebitis and thrombophlebitis of lower extremities, unspecified           |
| 451.81         | Phlebitis and thrombophlebitis of iliac vein                               |
| 451.83         | Phlebitis and thrombophlebitis of deep veins of upper extremities          |
| 451.84         | Phlebitis and thrombophlebitis of upper extremities, unspecified           |
| 451.89         | Phlebitis and thrombophlebitis of other sites                              |
| 451.90         | Phlebitis and thrombophlebitis of unspecified site                         |
| 453.1          | Thrombophlebitis migrans                                                   |
| 453.3          | Embolism and thrombosis of renal vein                                      |
| 453.20         | Other venous embolism and thrombosis of inferior vena cava                 |

## a. (Continued)

| ICD-9 CM codes | Definition                                                                                                                           |
|----------------|--------------------------------------------------------------------------------------------------------------------------------------|
| 453.40         | Acute venous embolism and thrombosis of unspecified deep vessels of lower extremity                                                  |
| 453.41         | Acute venous embolism and thrombosis of deep vessels of proximal lower extremity                                                     |
| 453.42         | Acute venous embolism and thrombosis of deep vessels of distal lower extremity                                                       |
| 453.50         | Chronic venous embolism and thrombosis of unspecified deep vessels of lower extremity                                                |
| 453.51         | Chronic venous embolism and thrombosis of deep vessels of proximal lower extremity                                                   |
| 453.52         | Chronic venous embolism and thrombosis of deep vessels of distal lower extremity                                                     |
| 453.6          | Venous embolism and thrombosis of superficial vessels of lower extremity                                                             |
| 453.71         | Chronic venous embolism and thrombosis of superficial veins of upper extremity                                                       |
| 453.72         | Chronic venous embolism and thrombosis of deep veins of upper extremity                                                              |
| 453.73         | Chronic venous embolism and thrombosis of upper extremity, unspecified                                                               |
| 453.74         | Chronic venous embolism and thrombosis of axillary veins                                                                             |
| 453.75         | Chronic venous embolism and thrombosis of subclavian veins                                                                           |
| 453.76         | Chronic venous embolism and thrombosis of internal jugular veins                                                                     |
| 453.77         | Chronic venous embolism and thrombosis of other thoracic veins                                                                       |
| 453.79         | Chronic venous embolism and thrombosis of other specified veins                                                                      |
| 453.81         | Acute venous embolism and thrombosis of superficial veins of upper extremity                                                         |
| 453.82         | Acute venous embolism and thrombosis of deep veins of upper extremity                                                                |
| 453.83         | Acute venous embolism and thrombosis of upper extremity, unspecified                                                                 |
| 453.84         | Acute venous embolism and thrombosis of axillary veins                                                                               |
| 453.85         | Acute venous embolism and thrombosis of subclavian veins                                                                             |
| 453.86         | Acute venous embolism and thrombosis of internal jugular veins                                                                       |
| 453.87         | Acute venous embolism and thrombosis of other thoracic veins                                                                         |
| 453.89         | Acute venous embolism and thrombosis of other specified veins                                                                        |
| 453.90         | Other venous embolism and thrombosis of unspecified site                                                                             |
| 459.10         | Postphlebotic syndrome without complications                                                                                         |
| 459.11         | Postphlebotic syndrome with ulcer                                                                                                    |
| 459.12         | Postphlebotic syndrome with inflammation                                                                                             |
| 459.13         | Postphlebotic syndrome with ulcer and inflammation                                                                                   |
| 459.19         | Postphlebotic syndrome with other complication                                                                                       |
| 671.30         | Deep phlebothrombosis, antepartum, unspecified as to episode of care or not applicable                                               |
| 671.31         | Deep phlebothrombosis, antepartum, delivered, with or without mention of antepartum condition                                        |
| 671.33         | Deep phlebothrombosis, antepartum, antepartum condition or complication                                                              |
| 671.40         | Deep phlebothrombosis, postpartum, unspecified as to episode of care or not applicable                                               |
| 671.42         | Deep phlebothrombosis, postpartum, delivered, with mention of postpartum complication                                                |
| 671.44         | Deep phlebothrombosis, postpartum, postpartum condition or complication                                                              |
| 671.50         | Other phlebitis and thrombosis complicating pregnancy and the puerperium, unspecified as to episode of care or not applicable        |
| 671.51         | Other phlebitis and thrombosis complicating pregnancy and the puerperium, delivered, with or without mention of antepartum condition |
| 671.52         | Other phlebitis and thrombosis complicating pregnancy and the puerperium, delivered, with mention of postpartum complication         |
| 671.53         | Other phlebitis and thrombosis complicating pregnancy and the puerperium, antepartum condition or complication                       |
| 671.54         | Other phlebitis and thrombosis complicating pregnancy and the puerperium, postpartum condition or complication                       |

(Continued)

## a. (Continued)

| ICD-9 CM codes | Definition                                                                                                                  |
|----------------|-----------------------------------------------------------------------------------------------------------------------------|
| 671.90         | Unspecified venous complication in pregnancy and the puerperium, unspecified as to episode of care or not applicable        |
| 671.91         | Unspecified venous complication of pregnancy and the puerperium, delivered, with or without mention of antepartum condition |
| 671.92         | Unspecified venous complication of pregnancy and the puerperium, delivered, with mention of postpartum complication         |
| 671.93         | Unspecified venous complication of pregnancy and the puerperium, antepartum condition or complication                       |
| 671.94         | Unspecified venous complication of pregnancy and the puerperium, postpartum condition or complication                       |
| V12.51         | Personal history of venous thrombosis and embolism                                                                          |
| V12.52         | Personal history of thrombophlebitis                                                                                        |
| V12.59         | Personal history of other diseases of circulatory system                                                                    |
| V58.61         | Long-term (current) use of anticoagulants                                                                                   |
| V58.63         | Long-term (current) use of antiplatelet/antithrombotic                                                                      |

## b. ICD-9 Procedure codes for DVT

| ICD-9 CM Procedure codes | Definition                                                                                                                                                                                        |
|--------------------------|---------------------------------------------------------------------------------------------------------------------------------------------------------------------------------------------------|
| 00.03                    | Therapeutic ultrasound of peripheral vascular vessels; antirestenotic ultrasound; intravascular non-ablative ultrasound                                                                           |
| 00.22                    | Intravascular imaging of intrathoracic vessels; aorta and aortic arch; intravascular ultrasound (IVUS), intrathoracic vessels; vena cava (superior) (inferior)                                    |
| 00.23                    | Intravascular imaging of peripheral vessels; imaging of: vessels of arm(s); vessels of leg(s); intravascular ultrasound (IVUS), peripheral vessels                                                |
| 00.28                    | Intravascular imaging, other specified vessel(s)                                                                                                                                                  |
| 00.29                    | Intravascular imaging, unspecified vessel(s)                                                                                                                                                      |
| 38.0 (0–9)               | Incision of vessel; embolectomy; thrombectomy                                                                                                                                                     |
| 38.2                     | Diagnostic procedures on blood vessels                                                                                                                                                            |
| 38.22                    | Percutaneous angiography                                                                                                                                                                          |
| 38.7                     | Interruption of the vena cava; insertion of implant or sieve in vena cava; ligation of vena cava (inferior) (superior); plication of vena cava; Greenfield filter                                 |
| 88.01                    | Computerized axial tomography of abdomen                                                                                                                                                          |
| 88.02                    | Other abdomen tomography                                                                                                                                                                          |
| 88.6 <sup>a</sup>        | Phlebography; includes: angiography of veins; radiography of veins (by fluoroscopy); retrograde phlebography; venipuncture for injection of contrast material; venography using contrast material |
| 88.61                    | Phlebography of veins of head and neck using contrast material                                                                                                                                    |
| 88.62                    | Phlebography of pulmonary veins using contrast material                                                                                                                                           |
| 88.63                    | Phlebography of other intrathoracic veins using contrast material                                                                                                                                 |
| 88.64                    | Phlebography of the portal venous system using contrast material; splenoportogram (by splenic arteriography)                                                                                      |
| 88.65                    | Phlebography of other intra-abdominal veins using contrast material                                                                                                                               |
| 88.66                    | Phlebography of femoral and other lower extremity veins using contrast material                                                                                                                   |
| 88.67                    | Phlebography of other specified sites using contrast material                                                                                                                                     |
| 88.68                    | Impedance phlebography                                                                                                                                                                            |
| 88.76                    | Diagnostic ultrasound of abdomen and retroperitoneum                                                                                                                                              |

**b.** (Continued)

| ICD-9 CM Procedure codes | Definition                                                                                                                                                  |
|--------------------------|-------------------------------------------------------------------------------------------------------------------------------------------------------------|
| 88.77                    | Diagnostic ultrasound of peripheral vascular system; deep vein thrombosis ultrasonic scanning                                                               |
| 88.78                    | Diagnostic ultrasound of gravid uterus; intrauterine cephalometry: echo ultrasonic; placental localization by ultrasound                                    |
| 88.79                    | Other diagnostic ultrasound; ultrasonography of: multiple sites, nongravid uterus, total body                                                               |
| 88.92                    | Magnetic resonance imaging of chest and myocardium; for evaluation of hilar and mediastinal lymphadenopathy                                                 |
| 88.95                    | Magnetic resonance imaging of pelvis, prostate, and bladder                                                                                                 |
| 99.10                    | Injection or infusion of thrombolytic agent; alteplase; anistreplase; reteplase; streptokinase; tenecteplase; tissue plasminogen activator (TPA); urokinase |

<sup>a</sup>Requires fourth digit that shows location.

**c.** CPT codes for DVT

| CPT codes | Definition                                                                                                                                                                                                                                                             |
|-----------|------------------------------------------------------------------------------------------------------------------------------------------------------------------------------------------------------------------------------------------------------------------------|
| 01522     | Anesthesia for procedures on veins of lower leg; venous thrombectomy, direct or with catheter                                                                                                                                                                          |
| 34401     | Thrombectomy, direct or with catheter; vena cava, iliac vein, by abdominal incision                                                                                                                                                                                    |
| 34421     | Thrombectomy, direct or with catheter; vena cava, iliac, femoropopliteal vein, by leg incision                                                                                                                                                                         |
| 34451     | Thrombectomy, direct or with catheter; vena cava, iliac, femoropopliteal vein, by abdominal and leg incision                                                                                                                                                           |
| 34471     | Thrombectomy, direct or with catheter; subclavian vein, by neck incision                                                                                                                                                                                               |
| 34490     | Thrombectomy, direct or with catheter; axillary and subclavian vein, by arm incision                                                                                                                                                                                   |
| 37187     | Percutaneous transluminal mechanical thrombectomy, vein(s), including intraprocedural pharmacological thrombolytic injections and fluoroscopic guidance                                                                                                                |
| 37188     | Percutaneous transluminal mechanical thrombectomy, vein(s), including intraprocedural pharmacological thrombolytic injections and fluoroscopic guidance, repeat treatment on subsequent day during course of thrombolytic therapy                                      |
| 37191     | Insertion of intravascular vena cava filter, endovascular approach inclusive of vascular access, vessel selection, and all radiological supervision and interpretation, intraprocedural roadmapping, and imaging guidance (ultrasound and fluoroscopy), when performed |
| 37201     | Transcatheter therapy, infusion for thrombolysis other than coronary                                                                                                                                                                                                   |
| 37209     | Exchange of a previously placed intravascular catheter during thrombolytic therapy                                                                                                                                                                                     |

**2.2 PE-related ICD-9 codes, CPT codes, and ICD-10 codes****a.** ICD-9 CM codes for PE

| ICD-9 CM codes | Description                                                                                    |
|----------------|------------------------------------------------------------------------------------------------|
| 415.0          | Acute cor pulmonale                                                                            |
| 415.11         | Iatrogenic pulmonary embolism and infarction                                                   |
| 415.12         | Septic pulmonary embolism                                                                      |
| 415.13         | Saddle embolus of pulmonary artery                                                             |
| 415.19         | Other pulmonary embolism and infarction                                                        |
| 453.89         | Acute venous embolism and thrombosis of other specified veins                                  |
| 453.90         | Other venous embolism and thrombosis of unspecified site (embolism of vein, thrombosis [vein]) |
| 634.60         | Spontaneous abortion, complicated by embolism, unspecified                                     |
| 634.61         | Spontaneous abortion, complicated by embolism, incomplete                                      |
| 634.62         | Spontaneous abortion, complicated by embolism, complete                                        |

(Continued)

## a. (Continued)

| ICD-9 CM codes | Description                                                                                 |
|----------------|---------------------------------------------------------------------------------------------|
| 635.60         | Legally induced abortion, complicated by embolism, unspecified                              |
| 635.61         | Legally induced abortion, complicated by embolism, incomplete                               |
| 635.62         | Legally induced abortion, complicated by embolism, complete                                 |
| 636.60         | Illegally induced abortion, complicated by embolism, unspecified                            |
| 636.61         | Illegally induced abortion, complicated by embolism, incomplete                             |
| 636.62         | Illegally induced abortion, complicated by embolism, complete                               |
| 637.60         | Legally unspecified abortion, complicated by embolism, unspecified                          |
| 637.61         | Legally unspecified abortion, complicated by embolism, incomplete                           |
| 637.62         | Legally unspecified abortion, complicated by embolism, complete                             |
| 638.60         | Failed attempted abortion, complicated by embolism                                          |
| 639.60         | Embolism following abortion or ectopic and molar pregnancies                                |
| 671.32         | Obstetrical pyemic and septic embolism with delivery with postpartum complication           |
| 673.20         | Obstetrical blood-clot embolism, unspecified as to episode of care or not applicable        |
| 673.21         | Obstetrical blood-clot embolism, delivered, with or without mention of antepartum condition |
| 673.22         | Obstetrical blood-clot embolism, delivered, with mention of postpartum complication         |
| 673.23         | Obstetrical blood-clot embolism, antepartum condition or complication                       |
| 673.24         | Obstetrical blood-clot embolism, postpartum condition or complication                       |
| 673.30         | Obstetrical pyemic and septic embolism unspecified as to episode of care                    |
| 673.31         | Obstetrical pyemic and septic embolism with delivery with or without antepartum condition   |
| 673.33         | Obstetrical pyemic and septic embolism antepartum                                           |
| 673.34         | Obstetrical pyemic and septic embolism postpartum                                           |
| 673.80         | Other obstetrical pulmonary embolism unspecified as to episode of care                      |
| 673.81         | Other obstetrical pulmonary embolism with delivery with or without antepartum condition     |
| 673.82         | Other obstetrical pulmonary embolism with delivery with postpartum complication             |
| 673.83         | Other obstetrical pulmonary embolism antepartum                                             |
| 673.84         | Other obstetrical pulmonary embolism postpartum                                             |
| V12.51         | Personal history of venous thrombosis and embolism                                          |
| V12.55         | Personal history of pulmonary embolism                                                      |
| V12.59         | Personal history of other diseases of circulatory system                                    |
| V58.61         | Long-term (current) use of anticoagulants                                                   |
| V58.63         | Long-term (current) use of antiplatelet/antithrombotic                                      |

## b. ICD-9 Procedure codes for PE

| ICD-9 CM Procedure codes | Definition                                                                                                                                                                                        |
|--------------------------|---------------------------------------------------------------------------------------------------------------------------------------------------------------------------------------------------|
| 38.0 (0–9)               | Incision of vessel; embolectomy; thrombectomy                                                                                                                                                     |
| 38.7                     | Interruption of the vena cava; Insertion of implant or sieve in vena cava; ligation of vena cava (inferior) (superior); plication of vena cava; Greenfield filter                                 |
| 88.01                    | Computerized axial tomography of abdomen                                                                                                                                                          |
| 88.02                    | Other abdomen tomography                                                                                                                                                                          |
| 88.6 <sup>a</sup>        | Phlebography; includes: angiography of veins; radiography of veins (by fluoroscopy); retrograde phlebography; venipuncture for injection of contrast material; venography using contrast material |
| 88.61                    | Phlebography of veins of head and neck using contrast material                                                                                                                                    |
| 88.62                    | Phlebography of pulmonary veins using contrast material                                                                                                                                           |

**b.** (Continued)

| ICD-9 CM Procedure codes | Definition                                                                                                                                                  |
|--------------------------|-------------------------------------------------------------------------------------------------------------------------------------------------------------|
| 88.63                    | Phlebography of other intrathoracic veins using contrast material                                                                                           |
| 88.64                    | Phlebography of the portal venous system using contrast material; Splenoportogram (by splenic arteriography)                                                |
| 88.65                    | Phlebography of other intra-abdominal veins using contrast material                                                                                         |
| 88.66                    | Phlebography of femoral and other lower extremity veins using contrast material                                                                             |
| 88.67                    | Phlebography of other specified sites using contrast material                                                                                               |
| 88.68                    | Impedance phlebography                                                                                                                                      |
| 88.76                    | Diagnostic ultrasound of abdomen and retroperitoneum                                                                                                        |
| 88.77                    | Diagnostic ultrasound of peripheral vascular system; deep vein thrombosis ultrasonic scanning                                                               |
| 88.78                    | Diagnostic ultrasound of gravid uterus; intrauterine cephalometry; echo ultrasonic; placental localization by ultrasound                                    |
| 88.79                    | Other diagnostic ultrasound; ultrasonography of: multiple sites, nongravid uterus, total body                                                               |
| 88.92                    | Magnetic resonance imaging of chest and myocardium; for evaluation of hilar and mediastinal lymphadenopathy                                                 |
| 88.95                    | Magnetic resonance imaging of pelvis, prostate, and bladder                                                                                                 |
| 99.10                    | Injection or infusion of thrombolytic agent; alteplase; anistreplase; reteplase; streptokinase; tenecteplase; tissue plasminogen activator (TPA); urokinase |

<sup>a</sup>Requires fourth digit that shows location.

**c.** CPT codes for PE

| CPT codes | Description                                                                                                                                                                                                                                                            |
|-----------|------------------------------------------------------------------------------------------------------------------------------------------------------------------------------------------------------------------------------------------------------------------------|
| 33310     | Cardiotomy, exploratory (includes removal of foreign body, atrial or ventricular thrombus); without cardiopulmonary bypass                                                                                                                                             |
| 33315     | Cardiotomy, exploratory (includes removal of foreign body, atrial or ventricular thrombus); with cardiopulmonary bypass                                                                                                                                                |
| 33910     | Pulmonary artery embolectomy, with cardiopulmonary bypass                                                                                                                                                                                                              |
| 33915     | Pulmonary artery embolectomy, without cardiopulmonary bypass                                                                                                                                                                                                           |
| 37187     | Percutaneous transluminal mechanical thrombectomy, vein(s), including intraprocedural pharmacological thrombolytic injections and fluoroscopic guidance                                                                                                                |
| 37188     | Percutaneous transluminal mechanical thrombectomy, vein(s), including intraprocedural pharmacological thrombolytic injections and fluoroscopic guidance, repeat treatment on subsequent day during course of thrombolytic therapy                                      |
| 37191     | Insertion of intravascular vena cava filter, endovascular approach inclusive of vascular access, vessel selection, and all radiological supervision and interpretation, intraprocedural roadmapping, and imaging guidance (ultrasound and fluoroscopy), when performed |
| 37201     | Transcatheter therapy, infusion for thrombolysis other than coronary                                                                                                                                                                                                   |

**d.** ICD-10 codes for PE

| ICD-10 codes     | Definition                           |
|------------------|--------------------------------------|
| I26              | Pulmonary embolism                   |
| I73 <sup>a</sup> | Other peripheral vascular disease    |
| I80              | Phlebitis and thrombophlebitis       |
| I81 <sup>a</sup> | Portal vein thrombosis               |
| I82 <sup>a</sup> | Other venous embolism and thrombosis |

<sup>a</sup>Included as a VTE-related death, but not included as a PE-related death.

**3. Provoking Categorization**

| Persistent                   | Transient                       | Time |
|------------------------------|---------------------------------|------|
| Active cancer <sup>a</sup>   | History of hospitalization      | 2 mo |
| Inflammatory bowel disease   | Immobilization                  | 3 mo |
| Antiphospholipid syndrome    | Surgery                         |      |
| Systemic lupus erythematosus | Trauma                          |      |
|                              | Central venous catheterization  |      |
|                              | Congestive heart failure        |      |
|                              | Myocardial infarction           |      |
|                              | Stroke                          |      |
|                              | Pregnancy: vaginal              |      |
|                              | Pregnancy: cesarean             | 3 mo |
|                              | Select medications <sup>b</sup> | 2 mo |

<sup>a</sup>Metastatic or diagnosed within 6 months of VTE diagnosis.

<sup>b</sup>Estrogen- and progesterone-containing drugs, raloxifene, tamoxifen, erythropoietin, romiplostim, oprelvekin, eltrombopag, thalidomide, and lenalidomide.

**4. Thrombophilic and prothrombotic conditions**

Known thrombophilic or prothrombotic conditions included antiphospholipid antibody syndrome, antithrombin deficiency, activated protein C resistance, disseminated intravascular coagulation, factor V Leiden, family history of VTE, inflammatory bowel disease, protein C deficiency, protein S deficiency, prothrombin 20210, sickle cell disease, systemic lupus erythematosus, and thalassemia.
